# Supplementary material
Source: PubMed Central journal article supplement (PMC10231617)
Supplement: ebmental-2020-300184supp001.pdf [file ebmental-2020-300184supp001.pdf]

Supplement to Levine, et al. Linking the Mini-Mental State Examination, the Alzheimer’s Disease Assessment Scale-Cognitive Subscale, and the Severe Impairment Battery: Evidence from Individual Participant Data from Five Randomized Clinical Trials of Donepezil

|                                                                                                        |   |
|--------------------------------------------------------------------------------------------------------|---|
| eTable 1: Total sample: MMSE total scores linking with ADAS-Cog total scores.....                      | 2 |
| eTable 2: Total sample: MMSE total change scores linking with ADAS-Cog total change scores .....       | 3 |
| eTable 3: Total sample: MMSE total scores linking with SIB total scores .....                          | 4 |
| eTable 4: Total sample: MMSE total change scores linking with SIB total change scores.....             | 5 |
| eTable 5: Sensitivity analysis: MMSE total scores linking with ADAS-Cog total scores .....             | 6 |
| eTable 6: Sensitivity analysis: MMSE total change scores linking with ADAS-Cog total change scores ... | 7 |

eTable 1: Total sample: MMSE total scores linking with ADAS-Cog total scores

| MMSE | Baseline<br>(n=1102) | Week 1<br>(n=152) | Week 3<br>(n=597) | Week 6<br>(n=996) | Week 9<br>(n=562) | Week 12<br>(n=961) | Week 18<br>(n=381) | Week 24<br>(n=380) |
|------|----------------------|-------------------|-------------------|-------------------|-------------------|--------------------|--------------------|--------------------|
| 3    |                      |                   |                   |                   | 60                |                    |                    | 67                 |
| 4    |                      |                   |                   |                   | 60                | 66                 |                    | 67                 |
| 5    |                      | 54                |                   | 60                | 60                | 61                 | 64                 | 61                 |
| 6    | 61                   | 54                |                   | 60                | 60                | 60                 | 64                 | 55                 |
| 7    | 60                   | 54                |                   | 58                | 60                | 57                 | 58                 | 55                 |
| 8    | 59                   | 54                | 61                | 49                | 60                | 54                 | 57                 | 50                 |
| 9    | 56                   | 54                | 52                | 47                | 60                | 52                 | 50                 | 48                 |
| 10   | 51                   | 51                | 49                | 46                | 48                | 48                 | 50                 | 45                 |
| 11   | 47                   | 46                | 46                | 44                | 46                | 46                 | 48                 | 44                 |
| 12   | 44                   | 45                | 42                | 43                | 45                | 44                 | 42                 | 42                 |
| 13   | 40                   | 44                | 41                | 40                | 43                | 41                 | 36                 | 38                 |
| 14   | 38                   | 40                | 39                | 38                | 40                | 38                 | 35                 | 35                 |
| 15   | 36                   | 33                | 36                | 34                | 35                | 36                 | 34                 | 34                 |
| 16   | 34                   | 32                | 33                | 32                | 32                | 33                 | 32                 | 31                 |
| 17   | 31                   | 31                | 31                | 30                | 31                | 31                 | 29                 | 30                 |
| 18   | 28                   | 30                | 28                | 26                | 27                | 28                 | 28                 | 27                 |
| 19   | 26                   | 27                | 26                | 25                | 26                | 26                 | 27                 | 26                 |
| 20   | 24                   | 25                | 23                | 24                | 25                | 24                 | 24                 | 23                 |
| 21   | 23                   | 22                | 22                | 23                | 24                | 22                 | 21                 | 22                 |
| 22   | 21                   | 20                | 20                | 21                | 22                | 21                 | 19                 | 21                 |
| 23   | 19                   | 19                | 18                | 19                | 19                | 19                 | 18                 | 17                 |
| 24   | 18                   | 17                | 16                | 18                | 18                | 17                 | 16                 | 15                 |
| 25   | 16                   | 15                | 14                | 16                | 17                | 15                 | 14                 | 14                 |
| 26   | 13                   | 13                | 13                | 14                | 15                | 13                 | 11                 | 13                 |
| 27   | 8                    | 13                | 11                | 13                | 14                | 11                 | 10                 | 11                 |
| 28   | 6                    | 10                | 9                 | 11                | 13                | 10                 | 8                  | 10                 |
| 29   |                      | 9                 | 8                 | 9                 | 10                | 9                  | 7                  | 9                  |
| 30   |                      | 30                | 6                 | 6                 | 6                 | 7                  | 5                  | 7                  |

Note. MMSE total scores by ADAS-Cog total scores for each visit. The MMSE and ADAS-Cog total Spearman's correlation coefficients were of strong magnitude (i.e.  $r=0.70-0.89$ ) over time (Table 2).

eTable 2: Total sample: MMSE total change scores linking with ADAS-Cog total change scores

| MMSE | Week 1<br>(n=149) | Week 3<br>(n=594) | Week 6<br>(n=991) | Week 9<br>(n=560) | Week 12<br>(n=957) | Week 18<br>(n=380) | Week 24<br>(n=379) |
|------|-------------------|-------------------|-------------------|-------------------|--------------------|--------------------|--------------------|
| -10  |                   |                   |                   | 16                | 20                 |                    | 21                 |
| -9   |                   |                   |                   | 16                | 20                 | 17                 | 21                 |
| -8   |                   |                   | 18                | 16                | 20                 | 17                 | 19                 |
| -7   |                   |                   | 14                | 16                | 16                 | 17                 | 14                 |
| -6   | 11                | 11                | 9                 | 16                | 12                 | 15                 | 13                 |
| -5   | 4                 | 8                 | 8                 | 16                | 7                  | 7                  | 11                 |
| -4   | 1                 | 6                 | 6                 | 15                | 6                  | 6                  | 8                  |
| -3   | 1                 | 4                 | 4                 | 5                 | 4                  | 4                  | 7                  |
| -2   | 0                 | 2                 | 2                 | 2                 | 2                  | 3                  | 4                  |
| -1   | -2                | 0                 | 1                 | 1                 | 1                  | 1                  | 3                  |
| 0    | -3                | -1                | -1                | 1                 | -1                 | -1                 | 2                  |
| 1    | -4                | -3                | -2                | 0                 | -2                 | -3                 | 0                  |
| 2    | -4                | -4                | -4                | -4                | -4                 | -4                 | -2                 |
| 3    | -4                | -6                | -5                | -7                | -5                 | -6                 | -4                 |
| 4    | -6                | -7                | -7                | -9                | -7                 | -9                 | -6                 |
| 5    | -6                | -9                | -9                | -11               | -8                 | -10                | -10                |
| 6    | -7                | -12               | -10               | -11               | -9                 | -20                | -12                |
| 7    | -16               | -22               | -10               | -11               | -12                | -20                | -12                |
| 8    | -16               | -22               | -12               | -11               | -14                | -20                | -13                |
| 9    |                   | -22               | -24               | -11               | -18                | -20                | -14                |
| 10   |                   | -22               | -24               | -11               | -26                |                    |                    |
| 11   |                   | -22               | -24               | -11               | -26                |                    |                    |
| 12   |                   |                   |                   |                   | -26                |                    |                    |

Note. MMSE total change scores by ADAS-Cog total change scores for each visit. The MMSE and ADAS-Cog change scores Spearman's correlation coefficients were of weak magnitude (i.e.  $r=0.10-0.39$ ) to week 12 inclusive, and of moderate magnitude ( $r=0.40-0.69$ ) at week 24 (See Table 2).

eTable 3: Total sample: MMSE total scores linking with SIB total scores

| MMSE | Baseline<br>(n=1785) | Week 6<br>(n=1225) | Week 12<br>(n=1156) | Week 18<br>(n=1095) | Week 24<br>(n=1549) |
|------|----------------------|--------------------|---------------------|---------------------|---------------------|
| 0    | 4                    | 2                  | 6                   | 6                   | 5                   |
| 1    | 11                   | 11                 | 14                  | 16                  | 16                  |
| 2    | 23                   | 22                 | 29                  | 26                  | 26                  |
| 3    | 32                   | 32                 | 34                  | 34                  | 34                  |
| 4    | 40                   | 41                 | 39                  | 39                  | 41                  |
| 5    | 48                   | 47                 | 45                  | 44                  | 48                  |
| 6    | 53                   | 51                 | 52                  | 50                  | 53                  |
| 7    | 59                   | 55                 | 56                  | 54                  | 59                  |
| 8    | 64                   | 60                 | 61                  | 59                  | 64                  |
| 9    | 68                   | 65                 | 66                  | 66                  | 69                  |
| 10   | 72                   | 70                 | 70                  | 70                  | 73                  |
| 11   | 76                   | 74                 | 74                  | 75                  | 77                  |
| 12   | 79                   | 77                 | 77                  | 79                  | 80                  |
| 13   | 81                   | 81                 | 81                  | 82                  | 82                  |
| 14   | 83                   | 83                 | 83                  | 84                  | 85                  |
| 15   | 85                   | 85                 | 85                  | 86                  | 86                  |
| 16   | 86                   | 87                 | 87                  | 88                  | 88                  |
| 17   | 87                   | 89                 | 88                  | 89                  | 90                  |
| 18   | 88                   | 90                 | 90                  | 91                  | 91                  |
| 19   | 89                   | 91                 | 91                  | 92                  | 92                  |
| 20   | 90                   | 93                 | 93                  | 93                  | 94                  |
| 21   | 100                  | 94                 | 94                  | 95                  | 95                  |
| 22   | 100                  | 95                 | 95                  | 96                  | 96                  |
| 23   |                      | 96                 | 96                  | 96                  | 96                  |
| 24   |                      | 97                 | 97                  | 97                  | 98                  |
| 25   |                      | 98                 | 98                  | 98                  | 98                  |
| 26   |                      | 98                 | 98                  | 99                  | 99                  |
| 27   |                      | 99                 | 99                  | 99                  | 100                 |
| 28   |                      | 99                 | 100                 | 100                 | 100                 |
| 29   |                      | 100                |                     | 100                 | 100                 |
| 30   |                      |                    |                     | 100                 |                     |

Note. MMSE total scores by SIB total scores for each visit. The MMSE and SIB total Spearman's correlation coefficients were of strong magnitude (i.e.  $r=0.70-0.89$ ) over time (See Table 2).

eTable 4: Total sample: MMSE total change scores linking with SIB total change scores

| <b>MMSE</b> | <b>Week 6<br/>(n=1225)</b> | <b>Week 12<br/>(n=1156)</b> | <b>Week 18<br/>(n=1095)</b> | <b>Week 24<br/>(n=1548)</b> |
|-------------|----------------------------|-----------------------------|-----------------------------|-----------------------------|
| -12         |                            |                             | -45                         | -80                         |
| -11         |                            |                             | -34                         | -59                         |
| -10         |                            |                             | -34                         | -50                         |
| -9          | -38                        |                             | -34                         | -48                         |
| -8          | -34                        | -38                         | -32                         | -46                         |
| -7          | -28                        | -28                         | -26                         | -39                         |
| -6          | -22                        | -20                         | -22                         | -28                         |
| -5          | -16                        | -15                         | -17                         | -22                         |
| -4          | -13                        | -12                         | -13                         | -16                         |
| -3          | -8                         | -8                          | -8                          | -10                         |
| -2          | -4                         | -5                          | -5                          | -6                          |
| -1          | -2                         | -1                          | -1                          | -2                          |
| 0           | 1                          | 1                           | 2                           | 1                           |
| 1           | 4                          | 4                           | 4                           | 4                           |
| 2           | 6                          | 6                           | 6                           | 6                           |
| 3           | 8                          | 8                           | 8                           | 8                           |
| 4           | 11                         | 10                          | 11                          | 10                          |
| 5           | 15                         | 12                          | 13                          | 13                          |
| 6           | 18                         | 15                          | 16                          | 15                          |
| 7           | 23                         | 18                          | 20                          | 18                          |
| 8           | 24                         | 21                          | 24                          | 21                          |
| 9           | 33                         | 25                          | 29                          | 25                          |
| 10          | 36                         | 33                          | 41                          | 33                          |
| 11          |                            | 42                          | 48                          | 36                          |
| 12          |                            | 42                          | 48                          | 39                          |
| 13          |                            | 42                          | 48                          | 41                          |
| 14          |                            | 48                          | 48                          | 45                          |
| 15          |                            |                             | 50                          | 45                          |
| 16          |                            |                             |                             | 45                          |
| 17          |                            |                             |                             | 45                          |
| 18          |                            |                             |                             | 49                          |

Note. MMSE total change scores by SIB total change scores for each visit. The Spearman's correlation coefficients between the MMSE and SIB change scores across time were of weak magnitude to week 9 (i.e.  $r=0.10-0.39$ ), and of moderate magnitude ( $r=0.40-0.69$ ) thereafter (See Table 2).

eTable 5: Sensitivity analysis: MMSE total scores linking with ADAS-Cog total scores

| <b>MMSE</b> | <b>Baseline<br/>(n=623)</b> | <b>Week 1<br/>(n=152)</b> | <b>Week 3<br/>(n=144)</b> | <b>Week 6<br/>(n=559)</b> | <b>Week 9<br/>(n=135)</b> | <b>Week 12<br/>(n=539)</b> | <b>Week 18<br/>(n=381)</b> | <b>Week 24<br/>(n=380)</b> |
|-------------|-----------------------------|---------------------------|---------------------------|---------------------------|---------------------------|----------------------------|----------------------------|----------------------------|
| 3           |                             |                           |                           |                           |                           |                            |                            | 67                         |
| 4           |                             |                           |                           |                           |                           | 62                         |                            | 67                         |
| 5           |                             | 54                        |                           | 60                        | 52                        | 60                         | 64                         | 61                         |
| 6           | 61                          | 54                        |                           | 60                        | 52                        | 60                         | 64                         | 55                         |
| 7           | 60                          | 54                        |                           | 58                        | 46                        | 59                         | 58                         | 55                         |
| 8           | 60                          | 54                        | 61                        | 48                        | 45                        | 56                         | 57                         | 50                         |
| 9           | 58                          | 54                        | 50                        | 47                        | 45                        | 52                         | 50                         | 48                         |
| 10          | 52                          | 51                        | 47                        | 46                        | 45                        | 48                         | 50                         | 45                         |
| 11          | 45                          | 46                        | 46                        | 46                        | 42                        | 47                         | 48                         | 44                         |
| 12          | 41                          | 45                        | 42                        | 44                        | 41                        | 46                         | 42                         | 42                         |
| 13          | 40                          | 44                        | 40                        | 40                        | 40                        | 43                         | 36                         | 38                         |
| 14          | 38                          | 40                        | 39                        | 38                        | 32                        | 38                         | 35                         | 35                         |
| 15          | 36                          | 33                        | 38                        | 34                        | 32                        | 36                         | 34                         | 34                         |
| 16          | 35                          | 32                        | 35                        | 33                        | 32                        | 32                         | 32                         | 31                         |
| 17          | 32                          | 31                        | 33                        | 31                        | 31                        | 30                         | 29                         | 30                         |
| 18          | 30                          | 30                        | 30                        | 26                        | 30                        | 28                         | 28                         | 27                         |
| 19          | 27                          | 27                        | 26                        | 24                        | 28                        | 27                         | 27                         | 26                         |
| 20          | 24                          | 25                        | 21                        | 24                        | 24                        | 24                         | 24                         | 23                         |
| 21          | 22                          | 22                        | 20                        | 22                        | 24                        | 22                         | 21                         | 22                         |
| 22          | 21                          | 20                        | 20                        | 21                        | 21                        | 21                         | 19                         | 21                         |
| 23          | 19                          | 19                        | 18                        | 18                        | 18                        | 18                         | 18                         | 17                         |
| 24          | 18                          | 17                        | 16                        | 17                        | 16                        | 17                         | 16                         | 15                         |
| 25          | 16                          | 15                        | 16                        | 15                        | 15                        | 15                         | 14                         | 14                         |
| 26          | 13                          | 13                        | 14                        | 14                        | 14                        | 12                         | 11                         | 13                         |
| 27          | 8                           | 13                        | 13                        | 13                        | 13                        | 11                         | 10                         | 11                         |
| 28          | 8                           | 10                        | 12                        | 11                        | 10                        | 11                         | 8                          | 10                         |
| 29          |                             | 9                         | 11                        | 8                         | 9                         | 10                         | 7                          | 9                          |
| 30          |                             | 30                        | 6                         | 30                        | 8                         | 9                          | 5                          | 7                          |

Note. MMSE total scores by ADAS-Cog total scores for each visit.

eTable 6: Sensitivity analysis: MMSE total change scores linking with ADAS-Cog total change scores

| <b>X</b> | <b>Week 1<br/>(n=149)</b> | <b>Week 3<br/>(n=142)</b> | <b>Week 6<br/>(n=556)</b> | <b>Week 9<br/>(n=134)</b> | <b>Week 12<br/>(n=536)</b> | <b>Week 18<br/>(n=380)</b> | <b>Week 24<br/>(n=379)</b> |
|----------|---------------------------|---------------------------|---------------------------|---------------------------|----------------------------|----------------------------|----------------------------|
| -10      |                           |                           |                           | 10                        | 20                         |                            | 21                         |
| -9       |                           |                           |                           | 10                        | 20                         | 17                         | 21                         |
| -8       |                           |                           | 18                        | 10                        | 20                         | 17                         | 19                         |
| -7       |                           |                           | 14                        | 10                        | 20                         | 17                         | 14                         |
| -6       | 11                        |                           | 9                         | 10                        | 12                         | 15                         | 13                         |
| -5       | 4                         | 9                         | 8                         | 10                        | 7                          | 7                          | 11                         |
| -4       | 1                         | 9                         | 5                         | 10                        | 6                          | 6                          | 8                          |
| -3       | 1                         | 8                         | 3                         | 6                         | 5                          | 4                          | 7                          |
| -2       | 0                         | 5                         | 2                         | 6                         | 2                          | 3                          | 4                          |
| -1       | -2                        | 3                         | 0                         | 2                         | 1                          | 1                          | 3                          |
| 0        | -3                        | -1                        | -1                        | -1                        | -1                         | -1                         | 2                          |
| 1        | -4                        | -2                        | -2                        | -2                        | -2                         | -3                         | 0                          |
| 2        | -4                        | -3                        | -4                        | -4                        | -4                         | -4                         | -2                         |
| 3        | -4                        | -4                        | -5                        | -6                        | -5                         | -6                         | -4                         |
| 4        | -6                        | -6                        | -8                        | -8                        | -6                         | -9                         | -6                         |
| 5        | -6                        | -9                        | -8                        | -11                       | -7                         | -10                        | -10                        |
| 6        | -7                        | -16                       | -10                       | -14                       | -9                         | -20                        | -12                        |
| 7        | -16                       |                           | -10                       | -14                       | -12                        | -20                        | -12                        |
| 8        | -16                       |                           | -10                       |                           | -12                        | -20                        | -13                        |
| 9        |                           |                           | -20                       |                           | -18                        | -20                        | -14                        |
| 10       |                           |                           | -20                       |                           | -18                        |                            |                            |

Note. MMSE total change scores by ADAS-Cog total change scores for each visit.
